# Supplementary material for: Epigenetic and transcriptional features of the novel human imprinted lncRNA GPR1AS suggest it is a functional ortholog to mouse Zdbf2linc
Source: PubMed Central journal article supplement — Epigenetics. 2013 May 9;8(6):635–45. doi: 10.4161/epi.24887 (PMC3857343; doi:10.4161/epi.24887), 2013-05-09
Supplement: epi-8-635-s01.pdf [file epi-8-635-s01.pdf]

## **Supplemental Material to:**

**Hisato Kobayashi, Eikichi Yanagisawa, Akihiko Sakashita,  
Naoko Sugawara, Shiori Kumakura, Hidehiko Ogawa,  
Hidenori Akutsu, Kenichiro Hata, Kazuhiko Nakabayashi  
and Tomohiro Kono**

**Epigenetic and transcriptional features of the novel  
human imprinted lncRNA GPR1AS suggest it is a  
functional ortholog to mouse Zdbf2linc**

**Epigenetics 2013; 8(6)**

**<http://dx.doi.org/10.4161/epi.24887>**

**[http://www.landesbioscience.com/journals/epigenetics/  
article/24887/](http://www.landesbioscience.com/journals/epigenetics/article/24887/)**

# SUPPLEMENTARY FIGURES

```
ZDBF2_v1 1:MQRQGYCYSCYRQYNNLEQHLFSAQHRSLTRQSRRICTSSLMERFLQDVLQHPHYHCQESSSTQDETHVNTGSSSEVVHLDDAFSEEEEEDEDKVEDE 100
ZDBF2_v2 1:--MIPDGSSEIQEVMKNSGKHLFSAQHRSLTRQSRRICTSSLMERFLQDVLQHPHYHCQESSSTQDETHVNTGSSSEVVHLDDAFSEEEEEDEDKVEDE 98
*****
ZDBF2_v1 101:DATEERPSEVSEPIEBELHSRPHKSQEGTQEVSVRPSVIQKLEKGOQQPLEFVHKIGASVRKCNLVDIGQATNNRNLVRRPVICNAPASCLPESSNDRPV 200
ZDBF2_v2 99:DATEERPSEVSEPIEBELHSRPHKSQEGTQEVSVRPSVIQKLEKGOQQPLEFVHKIGASVRKCNLVDIGQATNNRNLVRRPVICNAPASCLPESSNDRPV 198
*****
ZDBF2_v1 201:TANTTSLPPAAHLDSVSKCDPNKVEKYLEQPDGASRNVPVSSHVETTSFSYQKHKESNRKSLRMNSDKLVLWVKVKSQKGLTSLAGLKPFHERMGTGKSLRV 300
ZDBF2_v2 199:TANTTSLPPAAHLDSVSKCDPNKVEKYLEQPDGASRNVPVSSHVETTSFSYQKHKESNRKSLRMNSDKLVLWVKVKSQKGLTSLAGLKPFHERMGTGKSLRV 298
*****
ZDBF2_v1 301:KSPSKLAVNPNKTDMPNKGIFEDTIAKNHEEFFSNMDCQTEQEKHLVFNKTAFWQKCSVSSEMFKDCISLQASDQPQETAQDLSLWKEEQIDQEDNYE 400
ZDBF2_v2 299:KSPSKLAVNPNKTDMPNKGIFEDTIAKNHEEFFSNMDCQTEQEKHLVFNKTAFWQKCSVSSEMFKDCISLQASDQPQETAQDLSLWKEEQIDQEDNYE 398
*****
ZDBF2_v1 401:SRGSEMSFDCSSSFHSLTDQSKVSAKEVNLKSEVTRTDVQYKNNKSYVSKISSDCDDILHLVTNQSQMIVKEISLQNRHISLVDQSYESSSSTNFDCDA 500
ZDBF2_v2 399:SRGSEMSFDCSSSFHSLTDQSKVSAKEVNLKSEVTRTDVQYKNNKSYVSKISSDCDDILHLVTNQSQMIVKEISLQNRHISLVDQSYESSSSTNFDCDA 498
*****
ZDBF2_v1 501:SPQSTSDYPQQSVTEVNLKPEVHIGLVDKNYSSSEVSADSVPLQSVVDRPPVAVTETKLRKKAHTSLVDNYSSCSETSPDCDVSLESVVDHPQLTV 600
ZDBF2_v2 499:SPQSTSDYPQQSVTEVNLKPEVHIGLVDKNYSSSEVSADSVPLQSVVDRPPVAVTETKLRKKAHTSLVDNYSSCSETSPDCDVSLESVVDHPQLTV 598
*****
ZDBF2_v1 601:KGRNLKGRQVHLKHKRKPSSAKAHLDCDVS LGTVADESQRAVEKINLLKEKNADLMDMNCESHGPEMGFQADAQLADQSQVAEIERQKVDVLDENKSVQ 700
ZDBF2_v2 599:KGRNLKGRQVHLKHKRKPSSAKAHLDCDVS LGTVADESQRAVEKINLLKEKNADLMDMNCESHGPEMGFQADAQLADQSQVAEIERQKVDVLDENKSVQ 698
*****
ZDBF2_v1 701:SSRSSLSSDPASLYSAHDEPQALDEVNLKELNIDMEVRSYDCSSSELTFDSDPPLLSVTEQSHLDAEGKERHIDLEDESCESDSEITFDSDIPLYS 800
ZDBF2_v2 699:SSRSSLSSDPASLYSAHDEPQALDEVNLKELNIDMEVRSYDCSSSELTFDSDPPLLSVTEQSHLDAEGKERHIDLEDESCESDSEITFDSDIPLYS 798
*****
ZDBF2_v1 801:VIDQPEVAVYEEETVDLESKSNESCSEITFDSDIPLHSGNDHPEVAVKEVIQKEEYIHLERKNDEPSGSEISSDSHAPLHVSNTSPEVAVKKNLPQKEE 900
ZDBF2_v2 799:VIDQPEVAVYEEETVDLESKSNESCSEITFDSDIPLHSGNDHPEVAVKEVIQKEEYIHLERKNDEPSGSEISSDSHAPLHVSNTSPEVAVKKNLPQKEE 898
*****
ZDBF2_v1 901:QVHLENKENEPIDSEVSLDYNII FHSVTGRSEDPKEISLHTKEHMYLENKSVFETSLSDSVPLQAATHKPEVIVKETWLQREKHAEPQGRSTEFSGSKT 1000
ZDBF2_v2 899:QVHLENKENEPIDSEVSLDYNII FHSVTGRSEDPKEISLHTKEHMYLENKSVFETSLSDSVPLQAATHKPEVIVKETWLQREKHAEPQGRSTEFSGSKT 998
*****
ZDBF2_v1 1001:SLDSGVPHYSVTEPQAVNINRKKQYVLENKNDKCSGSEIILDSNVPPQSMTDQPQLAFLKEKHVNLKDKNSKSGDSKITPDSQLQEAVKKIDQWKEE 1100
ZDBF2_v2 999:SLDSGVPHYSVTEPQAVNINRKKQYVLENKNDKCSGSEIILDSNVPPQSMTDQPQLAFLKEKHVNLKDKNSKSGDSKITPDSQLQEAVKKIDQWKEE 1098
*****
ZDBF2_v1 1101:VIGLKNKINEPSTYKLIHHPDVSQSVADQPKVAIKHVNLGNENHMYLEVKNYSQYSCSEMNLDSGFLGQSI VNRPIITILEQEHIIELEGKHNQCCGSEVS 1200
ZDBF2_v2 1099:VIGLKNKINEPSTYKLIHHPDVSQSVADQPKVAIKHVNLGNENHMYLEVKNYSQYSCSEMNLDSGFLGQSI VNRPIITILEQEHIIELEGKHNQCCGSEVS 1198
*****
ZDBF2_v1 1201:FSDDDPLQSVADRRLRETVEKISLWKDEEVDTEDRRNEAKGFEIMYDSVLDQPVAGQPEEVVKEVSLWKEHVLDENKIVKPTDSRINFDSHEPLQSVTNKI 1300
ZDBF2_v2 1199:FSDDDPLQSVADRRLRETVEKISLWKDEEVDTEDRRNEAKGFEIMYDSVLDQPVAGQPEEVVKEVSLWKEHVLDENKIVKPTDSRINFDSHEPLQSVTNKI 1298
*****
ZDBF2_v1 1301:PGANKEINLLREEHVCLDDKGYVPSDSEI IYVSNIPQSVIKQPHILEEHASLEDKSSNSYSPEESSDSDNSFQAAADELQKPVKEINLWKEDHIIYLED 1400
ZDBF2_v2 1299:PGANKEINLLREEHVCLDDKGYVPSDSEI IYVSNIPQSVIKQPHILEEHASLEDKSSNSYSPEESSDSDNSFQAAADELQKPVKEINLWKEDHIIYLED 1398
*****
ZDBF2_v1 1401:KSYKLGDFDVS YASHIPVQFVTDQSSVPVKEINLQKDHNDLENKCEVCGSEIKCHSCVHLQSEVDQPVQVSYKEADLQKEEHVMEKTDQPSDEMMY 1500
ZDBF2_v2 1399:KSYKLGDFDVS YASHIPVQFVTDQSSVPVKEINLQKDHNDLENKCEVCGSEIKCHSCVHLQSEVDQPVQVSYKEADLQKEEHVMEKTDQPSDEMMY 1498
*****
ZDBF2_v1 1501:DSVDPFQIVVNFQPGSVKETHLPKVLVLDLVPGDSYEVISDDIPLQLVTDPPQLTVKDISCINTECIDIEDKSCDFPGSEVRCNCKASTPSMTNCKT 1600
ZDBF2_v2 1499:DSVDPFQIVVNFQPGSVKETHLPKVLVLDLVPGDSYEVISDDIPLQLVTDPPQLTVKDISCINTECIDIEDKSCDFPGSEVRCNCKASTPSMTNCKT 1598
*****
ZDBF2_v1 1601:FKIINRKKDYIILGEPSCQSCGSEMNFVNDASDQSMYTESQGPDEKVMKYIDSEDKSCGYNGSKGFNLEDTSRHTTRHLQKAHKEASLRKDPNAGLKG 1700
ZDBF2_v2 1599:FKIINRKKDYIILGEPSCQSCGSEMNFVNDASDQSMYTESQGPDEKVMKYIDSEDKSCGYNGSKGFNLEDTSRHTTRHLQKAHKEASLRKDPNAGLKG 1698
*****
ZDBF2_v1 1701:KSCQSSASAVDFGASSKSALHRRADKKRSLKHRDLVESCPEDFGEMNFQCAPPLPSDTPQETVTKRHPCKKVSDDLKKNHDSQSSSVLKVDVSVRN 1800
ZDBF2_v2 1699:KSCQSSASAVDFGASSKSALHRRADKKRSLKHRDLVESCPEDFGEMNFQCAPPLPSDTPQETVTKRHPCKKVSDDLKKNHDSQSSSVLKVDVSVRN 1798
*****
ZDBF2_v1 1801:LKKAADVIEDNPDEPVLEALPHVPPSFVGTWTSQIMREDDIKINALVKEPREGRFHCYFDDDCETKVKVSKGKKVTVWADLQKEDTAPTQAVSESDDIV 1900
ZDBF2_v2 1799:LKKAADVIEDNPDEPVLEALPHVPPSFVGTWTSQIMREDDIKINALVKEPREGRFHCYFDDDCETKVKVSKGKKVTVWADLQKEDTAPTQAVSESDDIV 1898
*****
ZDBF2_v1 1901:CGISDIDDLVALDKPCHRHPAERPPKQGRVASQCQTAKISHSTQTSCKNYPMVKRKII RQEEEDPPKSKCSRLQDRKTKKVKVIGTVEFPASCTKVL 2000
ZDBF2_v2 1899:CGISDIDDLVALDKPCHRHPAERPPKQGRVASQCQTAKISHSTQTSCKNYPMVKRKII RQEEEDPPKSKCSRLQDRKTKKVKVIGTVEFPASCTKVL 1998
*****
ZDBF2_v1 2001:KPMQPKALCVLSSLNKLEKEGELPPKMRHHSWDNDRIFICKYKRNIFDYEPLIKQIVISPPPLSVIVPEFERRNWKIHFNRSNQNSSAGDNDADGQ 2100
ZDBF2_v2 1999:KPMQPKALCVLSSLNKLEKEGELPPKMRHHSWDNDRIFICKYKRNIFDYEPLIKQIVISPPPLSVIVPEFERRNWKIHFNRSNQNSSAGDNDADGQ 2098
*****
ZDBF2_v1 2101:GSASAPLMAVPARYGFNSHQGTSDSSLFLEESKVLHARELPKKNRQLTPLNHDVVKISPKSVRNKLLSQQSKKIHGKRVTTSSNKLGPFPKVKYKPIIL 2200
ZDBF2_v2 2099:GSASAPLMAVPARYGFNSHQGTSDSSLFLEESKVLHARELPKKNRQLTPLNHDVVKISPKSVRNKLLSQQSKKIHGKRVTTSSNKLGPFPKVKYKPIIL 2198
*****
ZDBF2_v1 2201:QKPRKASEKQSIWIRTKPSDIIRKYISKYSVFLRHRYSRS AFLGRYLLKSKSVVSRLLKAKRTAKVLLNSVPPAGAEELSSAMANPPKRPVRA SCR 2300
ZDBF2_v2 2199:QKPRKASEKQSIWIRTKPSDIIRKYISKYSVFLRHRYSRS AFLGRYLLKSKSVVSRLLKAKRTAKVLLNSVPPAGAEELSSAMANPPKRPVRA SCR 2298
*****
ZDBF2_v1 2301:VARRRKTDES YHGRQKGPSTPVRA YDLRSSSCLQQRERMTR LANKLRGNEVK 2354
ZDBF2_v2 2299:VARRRKTDES YHGRQKGPSTPVRA YDLRSSSCLQQRERMTR LANKLRGNEVK 2352
*****
```

**Supplementary Figure 1.** Amino acid sequence alignment of the human ZDBF2 isoforms encoded by ZDBF2 splicing variants *ZDBF2\_v1* and *ZDBF2\_v2*. ZDBF2\_V1 matches the original ZDBF2 protein sequence (accession number: NP\_065974).

chr2 (q33.3)

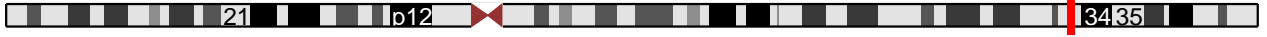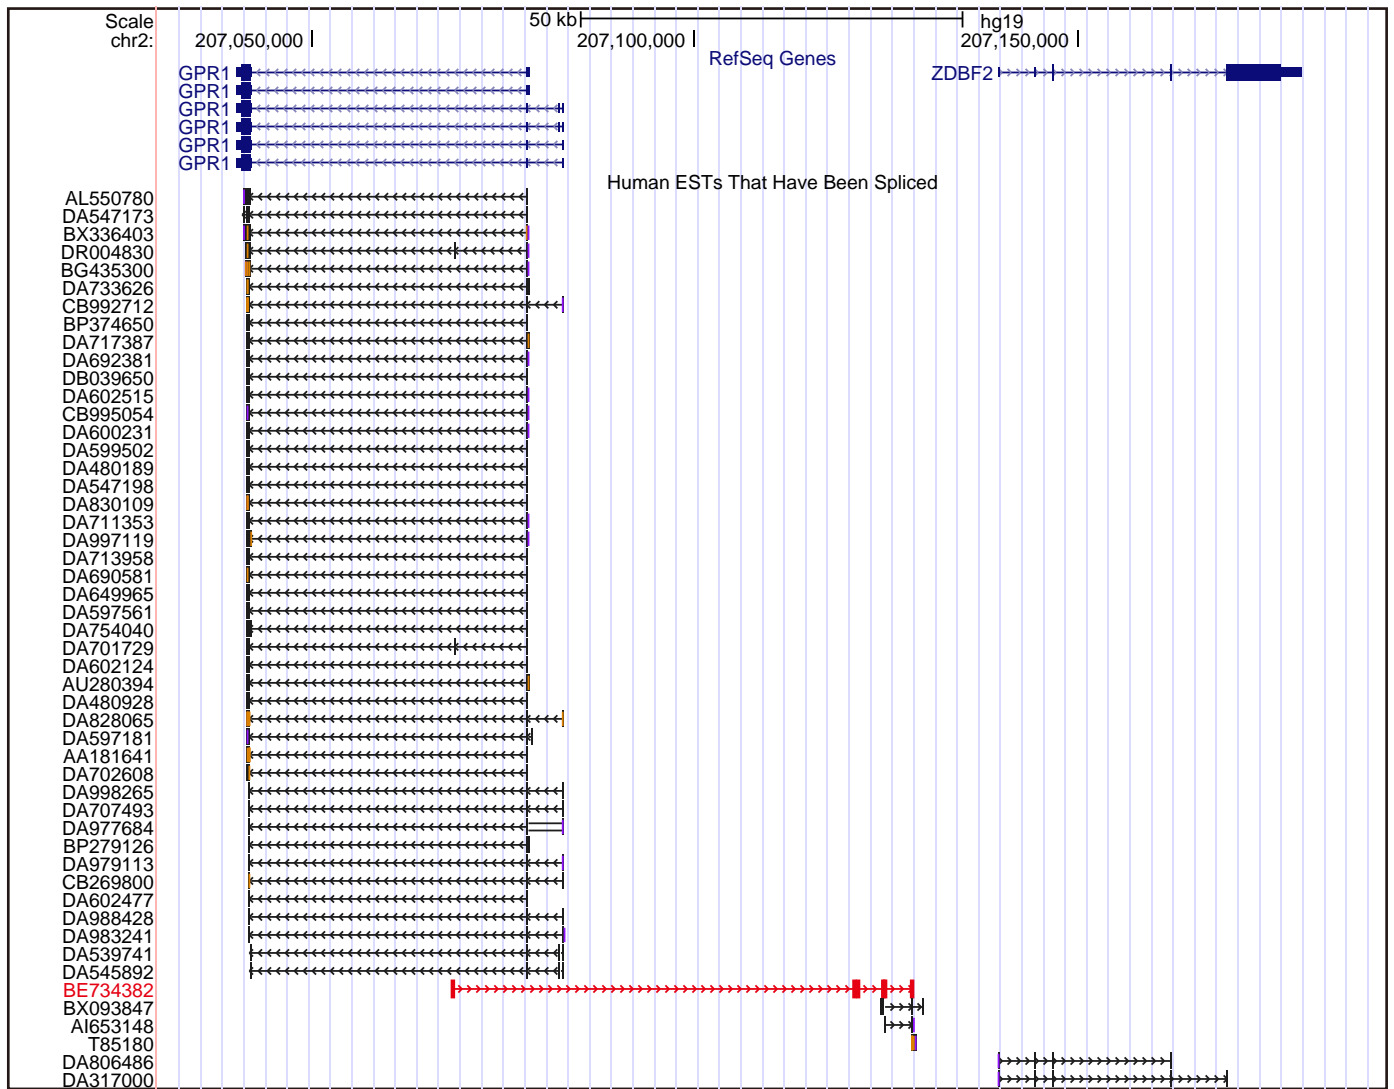

**Supplementary Figure 2.** Map of the *GPR1-ZDBF2* locus on human chromosome 2q33.3 (GRCh37/hg19, chr2: 207,030,001-207,190,000). Human RefSeq genes and ESTs were obtained from the UCSC Genome Browser (<http://genome.ucsc.edu/>). Exons and orientation of the BE734382 EST are highlighted in red.

```

10          20          30          40          50          60          70          80          90          100
GCATTCATTA CAAATCGTGT CCACAGCCCG CTTCCCAGCT TCCAACTTCC ACCTCCAGGG GAGGACTGGG GGCTGGAGAT TGCATTAATT TCCAATGGCC
110          120          130          140          150          160          170          180          190          200
AGTGGTTTAA TCAATCATGA CTAAGTAATG AGCCTCCGTA AAAACCAGAG CTTCCGGTCT GGTGAACACA CGGAGGTCCT GGAAATGGTG GCGCGCCAG
210          220          230          240          250          260          270          280          290          300
AGGGCATGGA AGCTCCGCGC CCCTTCCCAC AGACCTTGTC CCGTGCATCG CTTCCATCCG GCTCTTCTCTG AGTTCTGGCC CTTGTAGTAA ACCTGCAGTC
310          320          330          340          350          360          370          380          390          400
TTgatcaatt ttctctcagg aggetcttca ttgactcatg caaacagatt tctggcggga actgctccaa ggccttcag atgtgcacag gcatggatga
410          420          430          440          450          460          470          480          490          500
atcagagcag aagtggacag atgtagctca aatggagggt tctgctatAA TCTCAATAAG TATCCAGGCT GGAGTGCAGT GGC CGCATCT CGGCTCACTG
510          520          530          540          550          560          570          580          590          600
AAACCTCTGC CTCCCAGGTT CAAGCGATTC TCCTGCCTCA GCCTCTCGAA TAGCTGGGAT TACAGgcaac taaccatttt cccctctgt cttttgatgt
610          620          630          640          650          660          670          680          690          700
tcacctgaca agctctcggg ggtagccggg agctctgaca gagagcaaaa gaaataagGG CCGGTTTTAG CTGATAACCT CACCAGTCTT CACTTCGGCT
710          720          730          740          750          760          770          780          790          800
CTTCCTTOGC TGCCCTTCA GCTGCGGGGA ACTTGCTCTA GGCATCTTG GCAGGAGGGA GGGCGTCTGA GGGTACTGGT GCCTGCAGAC TTCAAGCACC
F6 810          820          830          840          850          860          870          880 3RA1 890          900
GAGAGACTTC TTGAAGCGGT GCTGCCTGGC CACTTGGAAA AAggtggatt aatttgggga tatccgagga gcccagagg gccattgtaa ttcaagatct
3RA2 910          920          930          940          950          960          970          980          990          1000
tcagtaaac tctgcccgg agaaagaacc cggccagtat tgggaccatc gtggtgacgc aggattggag gaacaggggt ttcggttgac tgagaagttc
R2 1010          1020          1030          1040          1050          1060          1070          1080          1090          1100
ctgtgagaga aacaggctca aatagagaga atagaaagat gtcgtgagga gccaggaaa aaaattttcc aggggtcagg gaatgaattc taatcagaac
1110          1120          1130          1140          1150          1160          1170          1180          1190          1200
aaggagccag caagaacttc cagcctagga ggtacttttc aaaagaagcc tgggaactcta acccagcttc tgagagtata ctcagaattg ttaagaatca
1210          1220          1230          1240          1250          1260          1270          1280          1290          1300
ggcagggcgc ggcggctcat gctgtaatc ccagcacttt gggaggctga ggcgggtgga tcaactgagg tccggagtgt gagatcacgc tgactaacaa
1310          1320          1330          1340          1350          1360          1370          1380          1390          1400
gatgaaaacc catctctaact aaaaaaatac aaaattagct gggcgtcgta gcgcatgcct gtaatcccag ctacttggga ggctgaggca ggagaattgc
1410          1420          1430          1440          1450          1460          1470          1480          1490          1500
ttgaaccocag gaggtggagg ttgcagtgag ccaagatcgc gcccttgca cccagcctgg gcaacaagag tgaaactctg cctcggaggg aaaaaaaaaa
1510          1520          1530          1540          1550          1560          1570          1580          1590          1600
aaaaa

```

**Supplementary Figure 3.** The *GPRIAS* lncRNA sequence. Odd and even exons are shown by upper and lower cases, respectively. Allows indicated the positions of the primer sets used in the RACE (blue) and allelic expression (red) analyses. Red circles indicated positions of the SNPs.

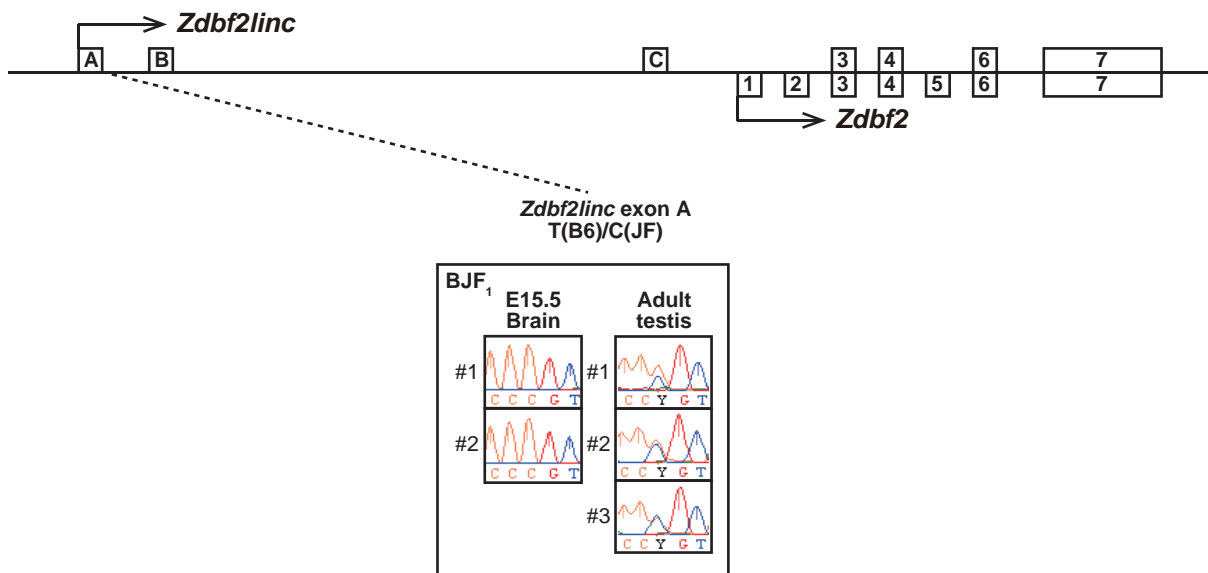

**Supplementary Figure 4.** Allele-specific RT-PCR sequencing analysis of the *Zdbf2linc*-specific exon in fetal brain at E15.5 and the adult testis from B1F<sub>1</sub> hybrids.

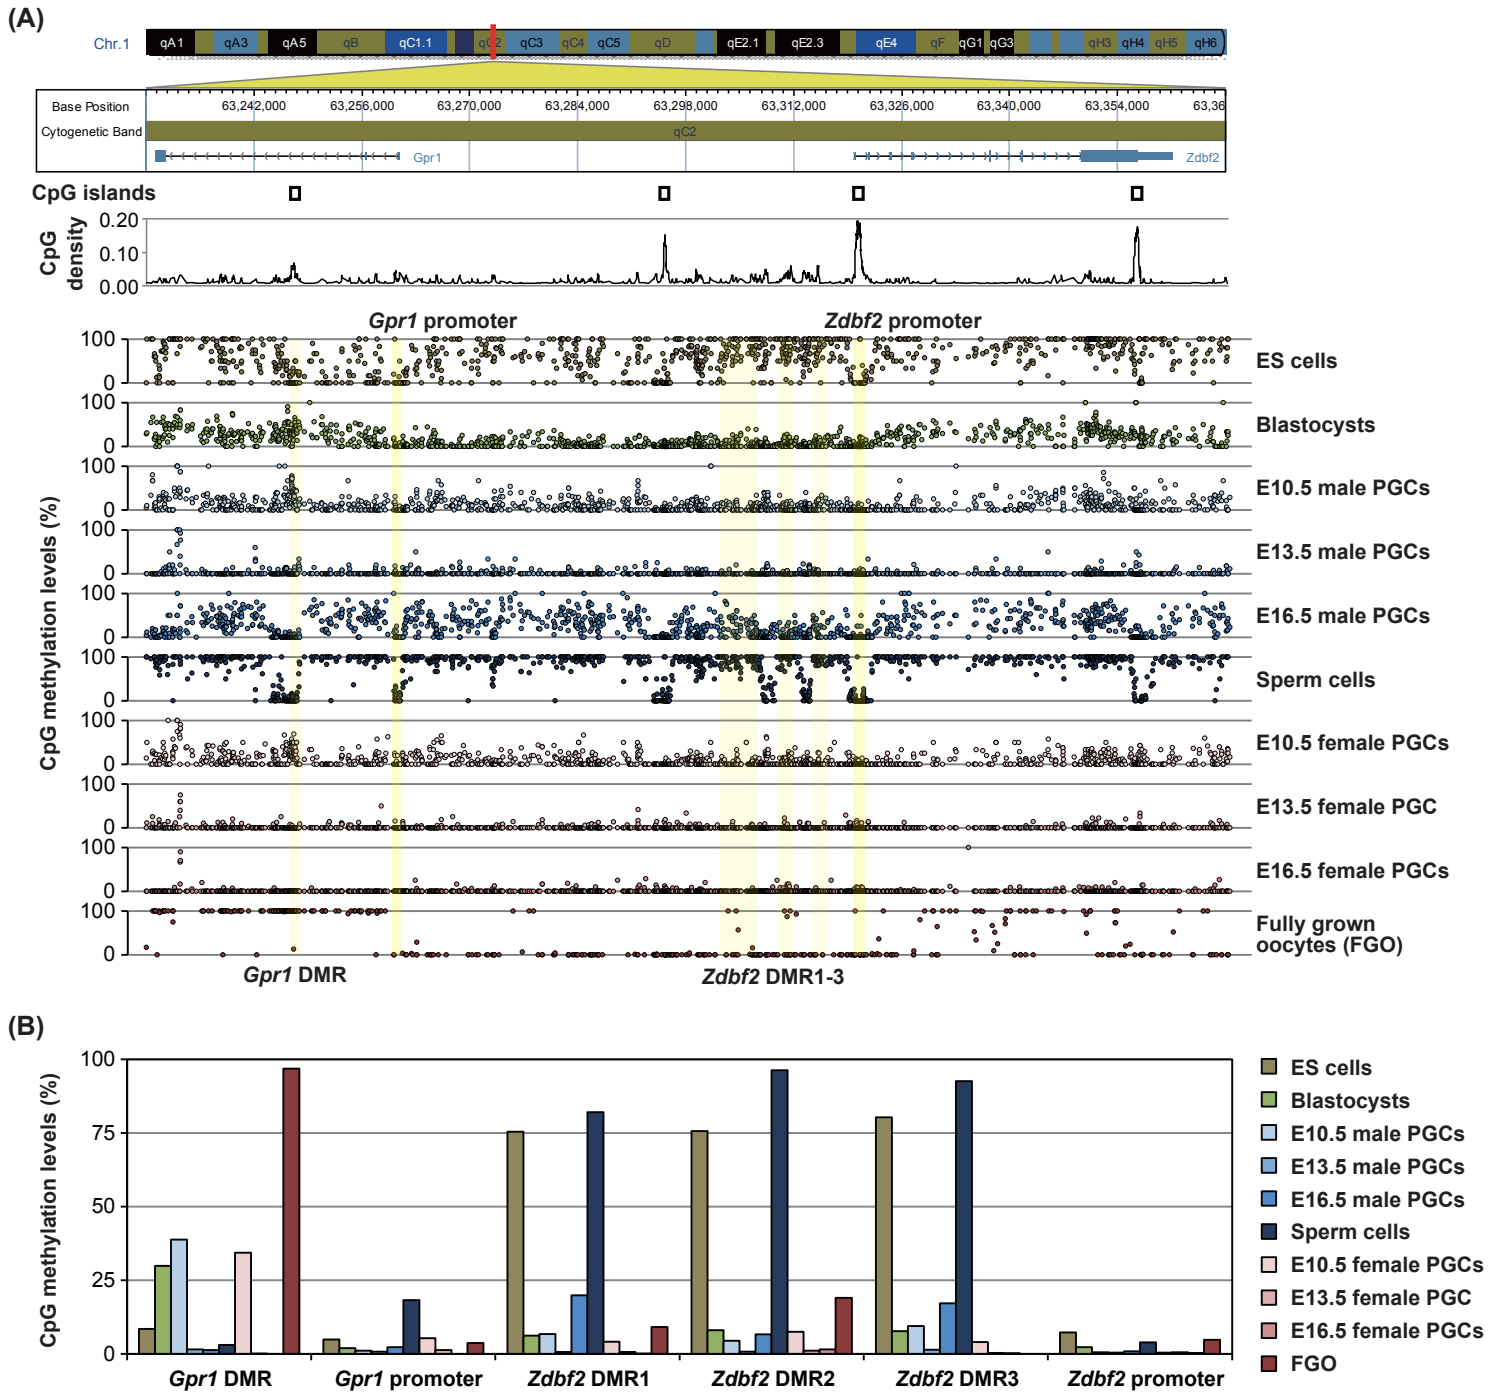

**Supplementary Figure 5.** High-resolution DNA methylome map of mouse chromosome 1 imprinting cluster. (A) Illumina GenomeStudio viewer displays the locations of genes in the *Gpr1-Zdbf2* locus (NCBI37/mm9, chr1: 63,228,001-63,368,000). Open boxes represent the location of CpG islands. Black line plots depict the distribution of CpG densities (number of CpG per 200 nucleotides) of individual CpGs. Dot plots represent the methylation levels at individual CpGs in ES cells (khaki), blastocysts (green), male PGCs at E10.5 (pale blue), E13.5 (light blue), and E16.5 (blue), sperm cells (dark blue), female PGCs at E10.5 (pale red), E13.5 (light red), and E16.5 (red), and fully grown oocytes (dark red). Yellow-shaded areas show the extent of the *Gpr1* DMR (63,246,657-63,247,300), *Gpr1* promoter (63,260,283-68,261,282), *Zdbf2* DMR1 (63,302,559-63,307,835), *Zdbf2* DMR2 (63,309,532-63,312,061), *Zdbf2* DMR3 (63,313,912-63,316,206), and *Zdbf2* promoter (63,319,260-63,320,704). (B) Bar graphs show the average methylation levels of *Gpr1* DMR, *Gpr1* promoter, *Zdbf2* DMRs, and *Zdbf2* promoter.

```

=====
file name: GPR1
sequences: 1
total length: 2326 bp
GC level: 41.06 %
bases masked: 340 bp ( 14.62 %)
=====

```

|                                    | number of elements* | length occupied | percentage of sequence |
|------------------------------------|---------------------|-----------------|------------------------|
| SINES:                             | 1                   | 326 bp          | 14.02 %                |
| ALUs                               | 1                   | 326 bp          | 14.02 %                |
| MIRs                               | 0                   | 0 bp            | 0.00 %                 |
| LINEs:                             | 0                   | 0 bp            | 0.00 %                 |
| LINE1                              | 0                   | 0 bp            | 0.00 %                 |
| LINE2                              | 0                   | 0 bp            | 0.00 %                 |
| L3/CR1                             | 0                   | 0 bp            | 0.00 %                 |
| LTR elements:                      | 0                   | 0 bp            | 0.00 %                 |
| ERVL                               | 0                   | 0 bp            | 0.00 %                 |
| ERVL-MaLRs                         | 0                   | 0 bp            | 0.00 %                 |
| ERV_classI                         | 0                   | 0 bp            | 0.00 %                 |
| ERV_classII                        | 0                   | 0 bp            | 0.00 %                 |
| DNA elements:                      | 0                   | 0 bp            | 0.00 %                 |
| hAT-Charlie                        | 0                   | 0 bp            | 0.00 %                 |
| TcMar-Tigger                       | 0                   | 0 bp            | 0.00 %                 |
| Unclassified:                      | 0                   | 0 bp            | 0.00 %                 |
| <b>Total interspersed repeats:</b> |                     | <b>326 bp</b>   | <b>14.02 %</b>         |
| Small RNA:                         | 0                   | 0 bp            | 0.00 %                 |
| Satellites:                        | 0                   | 0 bp            | 0.00 %                 |
| Simple repeats:                    | 0                   | 0 bp            | 0.00 %                 |
| Low complexity:                    | 1                   | 14 bp           | 0.60 %                 |

```

=====
file name: GPRIAS
sequences: 1
total length: 1505 bp
GC level: 51.76 %
bases masked: 1079 bp ( 71.69 %)
=====

```

|                                    | number of elements* | length occupied | percentage of sequence |
|------------------------------------|---------------------|-----------------|------------------------|
| SINES:                             | 2                   | 409 bp          | 27.18 %                |
| ALUs                               | 2                   | 409 bp          | 27.18 %                |
| MIRs                               | 0                   | 0 bp            | 0.00 %                 |
| LINEs:                             | 0                   | 0 bp            | 0.00 %                 |
| LINE1                              | 0                   | 0 bp            | 0.00 %                 |
| LINE2                              | 0                   | 0 bp            | 0.00 %                 |
| L3/CR1                             | 0                   | 0 bp            | 0.00 %                 |
| LTR elements:                      | 3                   | 670 bp          | 44.52 %                |
| ERVL                               | 1                   | 258 bp          | 17.14 %                |
| ERVL-MaLRs                         | 0                   | 0 bp            | 0.00 %                 |
| ERV_classI                         | 1                   | 311 bp          | 20.66 %                |
| ERV_classII                        | 0                   | 0 bp            | 0.00 %                 |
| DNA elements:                      | 0                   | 0 bp            | 0.00 %                 |
| hAT-Charlie                        | 0                   | 0 bp            | 0.00 %                 |
| TcMar-Tigger                       | 0                   | 0 bp            | 0.00 %                 |
| Unclassified:                      | 0                   | 0 bp            | 0.00 %                 |
| <b>Total interspersed repeats:</b> |                     | <b>1079 bp</b>  | <b>71.69 %</b>         |
| Small RNA:                         | 0                   | 0 bp            | 0.00 %                 |
| Satellites:                        | 0                   | 0 bp            | 0.00 %                 |
| Simple repeats:                    | 0                   | 0 bp            | 0.00 %                 |
| Low complexity:                    | 0                   | 0 bp            | 0.00 %                 |

```

=====
file name: ZDBF2_v1
sequences: 1
total length: 10304 bp
GC level: 38.21 %
bases masked: 459 bp ( 4.45 %)
=====

```

|                                    | number of elements* | length occupied | percentage of sequence |
|------------------------------------|---------------------|-----------------|------------------------|
| SINES:                             | 1                   | 287 bp          | 2.79 %                 |
| ALUs                               | 1                   | 287 bp          | 2.79 %                 |
| MIRs                               | 0                   | 0 bp            | 0.00 %                 |
| LINEs:                             | 1                   | 80 bp           | 0.78 %                 |
| LINE1                              | 0                   | 0 bp            | 0.00 %                 |
| LINE2                              | 0                   | 0 bp            | 0.00 %                 |
| L3/CR1                             | 1                   | 80 bp           | 0.78 %                 |
| LTR elements:                      | 0                   | 0 bp            | 0.00 %                 |
| ERVL                               | 0                   | 0 bp            | 0.00 %                 |
| ERVL-MaLRs                         | 0                   | 0 bp            | 0.00 %                 |
| ERV_classI                         | 0                   | 0 bp            | 0.00 %                 |
| ERV_classII                        | 0                   | 0 bp            | 0.00 %                 |
| DNA elements:                      | 0                   | 0 bp            | 0.00 %                 |
| hAT-Charlie                        | 0                   | 0 bp            | 0.00 %                 |
| TcMar-Tigger                       | 0                   | 0 bp            | 0.00 %                 |
| Unclassified:                      | 0                   | 0 bp            | 0.00 %                 |
| <b>Total interspersed repeats:</b> |                     | <b>367 bp</b>   | <b>3.56 %</b>          |
| Small RNA:                         | 0                   | 0 bp            | 0.00 %                 |
| Satellites:                        | 0                   | 0 bp            | 0.00 %                 |
| Simple repeats:                    | 3                   | 92 bp           | 0.89 %                 |
| Low complexity:                    | 0                   | 0 bp            | 0.00 %                 |

```

=====
file name: ZDBF2_v2
sequences: 1
total length: 10198 bp
GC level: 37.43 %
bases masked: 567 bp ( 5.56 %)
=====

```

|                                    | number of elements* | length occupied | percentage of sequence |
|------------------------------------|---------------------|-----------------|------------------------|
| SINES:                             | 1                   | 287 bp          | 2.81 %                 |
| ALUs                               | 1                   | 287 bp          | 2.81 %                 |
| MIRs                               | 0                   | 0 bp            | 0.00 %                 |
| LINEs:                             | 2                   | 188 bp          | 1.84 %                 |
| LINE1                              | 1                   | 108 bp          | 1.06 %                 |
| LINE2                              | 0                   | 0 bp            | 0.00 %                 |
| L3/CR1                             | 1                   | 80 bp           | 0.78 %                 |
| LTR elements:                      | 0                   | 0 bp            | 0.00 %                 |
| ERVL                               | 0                   | 0 bp            | 0.00 %                 |
| ERVL-MaLRs                         | 0                   | 0 bp            | 0.00 %                 |
| ERV_classI                         | 0                   | 0 bp            | 0.00 %                 |
| ERV_classII                        | 0                   | 0 bp            | 0.00 %                 |
| DNA elements:                      | 0                   | 0 bp            | 0.00 %                 |
| hAT-Charlie                        | 0                   | 0 bp            | 0.00 %                 |
| TcMar-Tigger                       | 0                   | 0 bp            | 0.00 %                 |
| Unclassified:                      | 0                   | 0 bp            | 0.00 %                 |
| <b>Total interspersed repeats:</b> |                     | <b>475 bp</b>   | <b>4.66 %</b>          |
| Small RNA:                         | 0                   | 0 bp            | 0.00 %                 |
| Satellites:                        | 0                   | 0 bp            | 0.00 %                 |
| Simple repeats:                    | 3                   | 92 bp           | 0.90 %                 |
| Low complexity:                    | 0                   | 0 bp            | 0.00 %                 |

**Supplementary Figure 6.** Identification of repetitive elements in nucleotide (cDNA) sequences of human *GPR1*, *GPRIAS*, and *ZDBF2*. The repeat files were generated by RepeatMasker (<http://www.repeatmasker.org/>).

Query Range: 1 - 355  
 Sbjct Range: 1 - 353  
 355 bp, INT.Score: 936, OPT.Score: 1690  
 Identity: 284 / 355 (80%)  
 Similarity: 336 / 355 (94%)

Query sequence: Human GPR1 protein  
 Target sequence: Mouse GPR1 protein

Query 1 MEDLEETLFEFENYSDYDLDYYSLESLEEKVQLGVVHVWVSLVLYCLAFVGLGIPGNAIWIWFTGFKWKTVTTLWFLNLAIADFIFLLFLPLYISYVAMN 100  
 Sbjct 1 MEVSKEMLFEEELNDYSDYDLDYYSQESDPPEKVVYLGVLHWISFLFLYALAFVGLGIPGNAIWIWLMGPKWKTVTTLWFLNLAIADFIFVFLFLPLYISYVALS 100  
 Query 101 FHWPFGIWLCKANSFTAQLNMFASVFFLTVISLDHYIHLIHPVLSSHRRRTLKNLSLVIIFWLLASLIGGPALYFRDTPVEPNHHTLCYNNFQKHDDPDLTL 200  
 Sbjct 101 FHWPFGLWLCKVNSFTAQLNMFSSVFFLTVISLDYRHLIHLHPGLSHRRRTLKSLSLVVLLVWLLASLLGGPTLYFRDTPMEVNNHICYNPFQEH--ELTL 198  
 Query 201 IRHHVLTWVKFIIGYLPPLLTMSICYLCLIFKVKRSILISSRFHWTLVWVAVVVCWTPYHLFSIWELTIHNSYSHHVMOAGIPLSTGLAFNLNSCLN 300  
 Sbjct 199 MRHHVLTWVKFLFGYLPPLLTMSCYLCLIFKMKRNLISRKHLWMILSVVIAFLVWVTPYHLFSIWELSIHNSSFQNLVGGIPLSTGLAFNLNSCLN 298  
 Query 301 PILYVLISKFKQARFRSSVAEILKYTLWEVSCSGTVSEQLRNSKTKLLETAQ 355  
 Sbjct 299 PILYVLISKFTQARFRASVAEILKRLWEASCSGTVSEQLRSKTKLLETAQ 353

Query Range: 20 - 2294  
 Sbjct Range: 15 - 2257  
 2362 bp, INT.Score: 340, OPT.Score: 3257  
 Identity: 996 / 2362 (42%)  
 Similarity: 1815 / 2362 (76%)

Query sequence: Human ZDBF2 protein  
 Target sequence: Mouse ZDBF2 protein

Query 20 QHLFSAQHRSLTRQRRRQICT--SSLMERFLQDVLQHPHYHCQESSSTQDETHVNTGSSSEVVHLDDAFSEEEEEDEKVED--EDATEERPSEVSEPIEEL 117  
 Sbjct 15 QHLFSSQHRSLTRQRRRTATNNTLMERFLQDVLRHHPYNYQDNRSAPNEPEAAAAAAAADPGSEVTVVLDSDSEKEDDTADSGAERNSEDSGVSVEEI 114  
 Query 118 HSRPHKSQEGTQEVSVRPSVIQKLEKQQQPLEFVHKIGASVRKCNLDIGQATNNRNLVPPVICNAPASCLPESSNDRPVNTANTS--LPPAAHLDV 216  
 Sbjct 115 DTRPGTSQE--HAEVAVRPSVIQKLERQQQSLLELAHKVSEGVKVNVSQVQATTSQKLVVPPVICNAPASCLPESSNDRPVNTANTS--LPPAAHLDV 213  
 Query 217 SKCDPNKVKYLEQPDGASRNPPVSSHVETTSFYSQKHKESNRKSLRMSDELKLVWVKDVSQKGLSAGLKHFERMGTK--GSLRVKSP--SKLAVNPNK 312  
 Sbjct 214 PACDTENLETYPDSPDQPSN--PSSQ-----PKTKDPKKK--LSINLDKLLAQRNLRAKGFASFVVRVRELTGSELCSVRAESSELEAGTAGNPRE 302  
 Query 313 TDMPNKGIFEDTIAKNHEFFSNMDCQTEKHLVFNKTAFAEQKCVSSEMFKFCISLQASADQPOETAQDLSLW----- 388  
 Sbjct 303 TDTLPEQAR--EQAIPKRRASRNTVRRQTEETRLVLNKPTLLKQRVSVSEERFSCGSRQAVPGPSQAAVRDLSSLLEEEVEEEKQEEEEEEQEEEEHE 401  
 Query 389 --KEEQIDQED--NYESRGSSEMSFDCSSSFHSLTDQSKVSAKEVNLKSKVETDQVYKNNKSYVSKISSDCCDILHLVTNSQMIKVEISLQNAHISLVDQS 486  
 Sbjct 402 EEEEGVQEDASYESRGSMSDFDCGSSCQSLSALELTAREINVSEE--THAYSQRRNETPTVSGATSD--NGSSSRQVITQNIQL-----ISLVDSE 490  
 Query 487 YESSSSETNFDCASPOSTSDYQQSVTEVNLKPEVHI GLVDPKNGYSSSEVSADSVPLQSVVDRPVPVAVTETKLRKKAHTSLVDNYGSSCSETSFDCD 586  
 Sbjct 491 YESSGSEVNFDDSLPSTSHRPPQPV--EVVVP--LRLVDKSYGSSSEPECDS--GSSADETPAASRQNPVVRNTHANLVE--NYGSSSFSSD 578  
 Query 587 VSLESVVDHPQLTVKGRNLKGRQVHLKHKRKPSSAKAHLDCDVLGTVADESQRAVEKINLLKEKNADLMDNCESHGPEMGFQADAQADQSQVAEIE 686  
 Sbjct 579 --SDAALDHPQVPVQEGSPRGRAVG--QGNEEQPSAAEHPERDGSLETVAHELQRESQENLFPNQKNTSLGDMNCESHGPEMGFQADQADQSQVAEIE 673  
 Query 687 RQKVDVLDENKSVQSSRSLSDSPASLYSAHDEPOEALDEVNLKELNIDMEVRSYDCSSSELTFFSDPPLSVTEQSHLDAEG--KERHIDLEDESCES 785  
 Sbjct 674 PEEVDLLENQSVHSGISNLSFDSNAS--YQSANDPQQAQWGVNLDLNDVMEVRSYDCSSSELTFFSDPPLSVTERSLLDPEGLNEDDFLNDENCVS 772  
 Query 786 DSSEITPDSIDPLYSVIDQPEVAVYEEETVDLESKSNESCVSEITFFSDIPLHSGNDHPEVAVKEVIQKE--EYIHLERKNDPEPSGSEISSDSHAPLHVS 884  
 Sbjct 773 SSSDITPDSIDPDDSVADQPVAVYEEEPVGLNKSNESECVSITFFSDIPLHSGNDHPEVAVKEVIQKE--EYIHLERKNDPEPSGSEISSDSHAPLHVS 872  
 Query 885 NSPEVAVKLNPKQEKQVH--LENKENEPIIDSE-----VSLDYNIIFHSVTGRSEDPIKEISLHTKEHMYLENKSVFET 956  
 Sbjct 873 NS--DVAVKININPKEDQVQIEQIEQKENEPTDSELNDCNSVNSKPGCSEDPILRVSETRLDSHVPPQSVIRKCEVVVKNVCLQKQKHAELTSPKST--ES 970  
 Query 957 SLSDVPLQAATHKPEVIVKETWLRQEKHAEFQGRSTEFSGSKTSLDSGV--PHYSVTEPOAVNKNRKKQYVLENKNDKCSGSEIILDSNVPQSMTDQ 1055  
 Sbjct 971 HSEVSSASTASHPVTEPYVKKAKRKTKHLVEVNSDDEYGGQPTFKFDVFRMTTEKQPAAALKEGHADP--KDKITELRGMVAVNNTADCLDSVLSQ 1067  
 Query 1056 PQLAFLEKHEVNLKDKNSKSGDSK-----ITFDSEQLQE--AVKKIDQWKEVIGLKNKINPESTYKLIHHPDVSQVADQPKVAIKHVNLGNNHMY 1147  
 Sbjct 1068 PQLA--SNENCVELKDTDGKPSDKASADSTGHFHSLPKQEFVDSKMNWKEKAKVLEQKISDLIYSKLIHDSNVSFRSAMDQLELAKQLISLGNNDQVS 1166  
 Query 1148 LEVKNQYSCSEMNLDGSLGQSVINVR--QITILEQEHIELEGGKHNCCGSEVSFSDSDPQLQSVADRRLRETVKEISLWKDEEVDTEDRRNEAKGFEIMY 1245  
 Sbjct 1167 LE--DNSQDTCSETNLDGSLGQSVAVVEPEPEVTVLEPEHVEQGRNNVPCDESVSDANGSVQLEAGQHSSEGNRS--QKDTDDTEGKRDDAQGGFITC 1263  
 Query 1246 DSDVLPQVAGQPEEVKESVSLWKEHVDLENKIVKPTDSRINFDSHEPLOSVTNKPIGANKEINLLREHVCLDDKGYVSDSEIIYVSNIPQSVIKQPH 1345  
 Sbjct 1264 DSNVFPQLAGH--IEVVDIDHWKDHVLEDKLGEKSNKSNVHSDPELQAVTNAQEPVEEINLPR--GRASPNGGCEPYGSTIVFPVNVIFCSVIQKQP 1361  
 Query 1346 ILEEEHASLEDKSSN-----SYPEESSDSNDSFQAAADLQKPEVKEINLWKEDHYLEDKSYKLGDFDVSYASHIPVQFVTDQS--SVPVKEINL 1434  
 Sbjct 1362 RLQKCKTSLKENSMPCEVNVDSCDGPEVSVSDNDCQSVAGHQLKPKDEKML--KEDHYLEDKSYKLVDFEPTDSDPEVQFVTVSVEAVSKEVNL 1460  
 Query 1435 QKDHNDLENKNCVCGSEIKCHSCVHLQSEVDQPOVSYKAEADLQKEHVVMEKTDQPSDSEMMYDSDVFPQIVVNVQFPQSVKETHLPKVVLDVLPD 1534  
 Sbjct 1461 QKENPDLLENENFQPCCEVACNSAVHLQSEADPPQVACKREADLDKKA--LDIEDKGSVTCVPEVYSDVSPQIVVNVQVTSDEGTDSPQVFPVVDVSSD 1559  
 Query 1535 SDYE--VISDDIPLQLVTPDPPOLTVKDISCINTECIDIEDKSCDFPFGEVRCNCKASTPMTNCKETFKIINRKKDYIILGEPSCQSCGSEMNFNVDASD 1633  
 Sbjct 1560 SDCDREVISDSNIPQLLEPPQMTVKETSDDINTDLSGSAANE--KYCKFCGCDYEAS--QSVTNQSKESFKIINRKNDYIILGDSVTCPCSGHLELNFVNDPSD 1657  
 Query 1634 QSMYTESQGDPEKVMKYIDSEDKSCYNGSKGKFNLEDTSRHTHRLQKAHKASLRKDPNAGLKGKSCQSSASAVDFGASSKALHRRADKRRKSLK 1733  
 Sbjct 1658 QPFTCQLQDFD--RNFIDPEKDFGSKCPKRLNWDTAHPVTHQLQKTGEATSLRDKQKRFRRDRGVESSSPAGDHAAYAVSVI-----R 1742  
 Query 1734 HRDLEVSCEPDGFEMNFQCAPPLP SDTDQPOETVKKRHPCKKYVSDLKEKNHDSQSSSVLKVDSVRNLKAKADVIDENPDEPVLEALPHVPPSFVGTWTS 1833  
 Sbjct 1743 QTALN--SC--GSEINFPQDFTYHSDIDPQ--PKKKGQKRVTFDLRVTKYEPNPNMYGEGEVAEDDLKEVV--VHEASPGQ--QAPPSIVGKT--C 1830  
 Query 1834 QIMREDDIKINALVKEFRGRFHCYFDDCETKVKSSKGGKVVWADLQKEDTAPTQAVSEDDIVCGISDIDDLVALDKPCHRHPPAERPQKQGRV 1933  
 Sbjct 1831 PQGREDDVTNT--QACQGYFYSYDGGSETTKILLGEBEKTIRSLL-----NQNTTISIQHVKGKVGDTGDFSVDLGK--QCSLAELHQHQHV 1917  
 Query 1934 ASQCQAKISHSTQTSCKNYPVMKRIIRQEDDPKSKSRLQDRKTKKVKIGTVEFPASCTKVLKPMQKALVCLVSSLNLIKLEGGELFPFKMRHH 2033  
 Sbjct 1918 TSQ--NOVEVRCGIQAS--SGKRRKITEQEEDSPKRC--PHHDSQKKAQAQITELPEPQTVLEPVQDPSLVYIFSSLS--MKEDQSLNPKTKPG 2008  
 Query 2034 SWDNDIRFICKYKRNIFDYEPLIKQIVISPLSVIVPEFERNVVKIHFNRNSQNSAGDNDADGQGSASAPLMAVARYGNSHQGTSDSSLFLEESK 2133  
 Sbjct 2009 S--DSDLPHIYSCREHT--SSGPRRRTVINPPQNLMPVEV-----GIDLNRHDPKPNAGDSSAKRQNLVSTSFMAPKRSVLKQFR--TNQSS--FLKKE 2097  
 Query 2134 VLHARELPKRRNFQLTFLNHDVVKISPKSVRNKLESQSKKIHGKRVTSSNKLGFPPKVKYPIILQKPRKASEQSIWIRTKPDIIRKYISKYSVF 2233  
 Sbjct 2098 DVGATQVPKD--NFQQTLLNRDGAKKFPKSVKKEDESQNRKFWKKM--VAANKLCLIKNAYKTMVLRKKSLKASEKLAWIQLKATDIIRKYVSRCHGL 2195  
 Query 2234 LRHYQSRSAFLGRVYKSKSVVSRLLKAKRTAKVL--LNSSVPPAGAEELSSAMANPPKRP 2294  
 Sbjct 2196 MPRRLSKTVLIRMQLRKKIVARKIKEAKRAEALAKLSRSPCPRPAPCPRALCPAP 2257

Supplementary Figure 7. Amino acid sequence alignment of imprinted gene products. Alignments of the human and mouse GPR1-ZDBF2 sequences are shown; >40% identity and >70% similarity were observed.



**Table S1. Exon locations of human *GPRIAS-ZDBF2* isoforms and mouse *Zdbf2linc***

| Gene/Transcript name | Exon number | Position (GRCh37/hg19)          |
|----------------------|-------------|---------------------------------|
| <i>GPRIAS</i>        | exon 1      | chr2: 207,068,100 - 207,068,401 |
|                      | exon 2      | chr2: 207,105,167 - 207,105,312 |
|                      | exon 3      | chr2: 207,120,590 - 207,120,706 |
|                      | exon 4      | chr2: 207,121,153 - 207,121,245 |
|                      | exon 5      | chr2: 207,124,555 - 207,124,739 |
|                      | exon 6      | chr2: 207,128,103 - 207,128,764 |
| <i>ZDBF2_v1</i>      | exon 1a     | chr2: 207,139,365 - 207,139,670 |
|                      | exon 2      | chr2: 207,144,264 - 207,144,316 |
|                      | exon 4      | chr2: 207,146,525 - 207,146,633 |
|                      | exon 6      | chr2: 207,161,970 - 207,162,097 |
|                      | exon 7      | chr2: 207,169,441 - 207,179,148 |
| <i>ZDBF2_v2</i>      | exon 1b     | chr2: 207,139,752 - 207,139,803 |
|                      | exon 2      | chr2: 207,144,264 - 207,144,316 |
|                      | exon 3      | chr2: 207,145,273 - 207,145,317 |
|                      | exon 4      | chr2: 207,146,525 - 207,146,633 |
|                      | exon 5      | chr2: 207,156,738 - 207,156,840 |
|                      | exon 6      | chr2: 207,161,970 - 207,162,097 |
|                      | exon 7      | chr2: 207,169,441 - 207,179,148 |
| Transcript name      | Exon number | Position (NCBI37/mm9)           |
| <i>Zdbf2linc</i>     | exon A      | chr1: 63,246,932 - 63,247,248   |
|                      | exon B      | chr1: 63,254,089 - 63,254,188   |
|                      | exon C      | chr1: 63,310,073 - 63,310,129   |
|                      | exon 3      | chr1: 63,324,505 - 63,324,557   |
|                      | exon 4      | chr1: 63,327,341 - 63,327,451   |
|                      | exon 6      | chr1: 63,341,490 - 63,341,620   |
|                      | exon 7      | chr1: 63,349,214 - 63,361,149   |

**Table S2. PCR primer information**

| Primers name      | Target region    | Target SNP        | Amplified region (hg19)         | Primer sequence (forward and reverse) | Product size (bp) | PCR              | PCR program  |            |            |            |                  | Cycles |
|-------------------|------------------|-------------------|---------------------------------|---------------------------------------|-------------------|------------------|--------------|------------|------------|------------|------------------|--------|
|                   |                  |                   |                                 |                                       |                   |                  | Pre-denature | Denature   | Annealing  | Elongation | Final elongation |        |
| GPR1AS_Ex2SNP_F9  | <i>GPR1AS</i>    | ID: rs1024809     | chr2: 207,105,183 - 207,120,618 | 5'-GGAGGCTCTTCATTGACTCATGC-3'         | 159               | RT-PCR,          | 94°C,        | 94°C,      | 60°C,      | 72°C,      | 72°C,            | 40     |
| GPR1AS_Ex3SNP_R14 | exon 2           | chr2: 207,105,300 |                                 | 5'-GCACTCCAGCCTGGATACTTATTG-3'        |                   | Real-time RT-PCR | 1 min        | 30 s       | 30 s       | 30 s       | 5 min            |        |
| GPR1AS_Ex6SNP_F6  | <i>GPR1AS</i>    | ID: rs34523400    | chr2: 207,124,691 - 207,128,270 | 5'-AGCACGGAGAGACTTCTTGAAG-3'          | 217               | RT-PCR           | 94°C,        | 94°C,      | 60°C,      | 72°C,      | 72°C,            | 40     |
| GPR1AS_Ex7SNP_R7  | exon 6           | chr2: 207,128,132 |                                 | 5'-TTCCTCACAGGAACCTCTCAGTC-3'         |                   | 1 min            | 30 s         | 30 s       | 30 s       | 5 min      |                  |        |
| GPR1AS_Ex5SNP_F13 | <i>GPR1AS</i>    | ID: rs10206513    | chr2: 207,124,719 - 207,128,340 | 5'-TGCCTGGCCACTTGGAAAAAG-3'           | 259               | RT-PCR           | 94°C,        | 94°C,      | 60°C,      | 72°C,      | 72°C,            | 40     |
| GPR1AS_Ex7SNP_R15 | exon 6           | chr2: 207,128,291 |                                 | 5'-CCCTGACCCCTGGAAAAITTTG-3'          |                   | 1 min            | 30 s         | 30 s       | 30 s       | 5 min      |                  |        |
| GPRAS_BS_GA_F6    | <i>GPR1</i>      | ID: rs16838074    | chr2: 207,067,497 - 207,068,152 | 5'-AAAAAAAACCTCTACTCTCTCAATATCTC-3'   | 656               | Bisulfite        | 98°C,        | 98°C,      | 60°C,      | 72°C,      | 72°C,            | 35     |
| GPRAS_BSR3        | DMR              | chr2: 207,067,553 |                                 | 5'-GGTGGGAAGTTGGAAAGTTGGGAA-3'        |                   | 30 s             | 10 s         | 30 s       | 30 s       | 5 min      |                  |        |
| ZDBF2_DMR_BSF2    | <i>ZDBF2</i>     | ID: rs10206513    | chr2: 207,128,034 - 207,128,504 | 5'-CTTCCTTAAATAAAACCAACATCATAATC-3'   | 471               | Bisulfite        | 98°C,        | 98°C,      | 57°C,      | 72°C,      | 72°C,            | 40     |
| ZDBF2_DMR_BSR1    | DMR              | chr2: 207,128,291 |                                 | 5'-TTTTTAAAGTTGGGATTATAGGTATGAG-3'    |                   | 30 s             | 10 s         | 30 s       | 30 s       | 5 min      |                  |        |
| ZDBF2_ex1a1b_BSF2 | <i>ZDBF2</i>     |                   | chr2: 207,139,168 - 207,139,407 | 5'-GTTTATGAGTTTGTAGTTATTTTGTGG-3'     | 240               | Bisulfite        | 98°C,        | 98°C,      | 53°C,      | 72°C,      | 72°C,            | 40     |
| ZDBF2_ex1a1b_BSR2 | promoter         |                   |                                 | 5'-TTACAACCCATAATAAAAITTAACRTC-3'     |                   | 30 s             | 10 s         | 30 s       | 30 s       | 5 min      |                  |        |
| ACTB_RT_F         | ACTB             |                   | chr7: 5,568,325 - 5,568,884     | 5'-TACAATGAGCTGCGTGTGG-3'             | 119               | Real-time RT-PCR | 94°C,        | 94°C,      | 60°C,      | 72°C,      | 72°C,            | 40     |
| ACTB_RT_R         | exon 3 & 4       |                   |                                 | 5'-GGGGTGTGAAGTCTCAA-3'               |                   | 1 min            | 30 s         | 30 s       | 30 s       | 5 min      |                  |        |
| Primers name      | Target region    | Target SNP        | Amplified region (mm9)          | Primer sequence (forward and reverse) | Product size (bp) | PCR              | PCR program  |            |            |            |                  | Cycles |
| Zdbf2linc_F6      | <i>Zdbf2linc</i> | B6: T, JF: C      | chr1: 63,247,050 - 63,254,157   | 5'-TACGTCAGCAAGAGCATCATGG-3'          | 267               | RT-PCR           | 94°C, 1 min  | 94°C, 30 s | 62°C, 30 s | 72°C, 30 s | 72°C, 5 min      | 35     |
| Zdbf2linc_R6      | exon A & B       | chr1: 63,247,248  |                                 | 5'-TTAACTGAGTCCATCGGCTCTTC-3'         |                   | Real-time RT-PCR | 95°C, 30 s   | 95°C, 5 s  | 62°C, 30 s | 72°C, 30 s |                  | 40     |
| Zdbf2_RT_ex7F     | <i>Zdbf2linc</i> | B6: A, JF: G      | chr1: 63,360,906 - 63,361,130   | 5'-TACGTCAGCAAGAGCATCATGG-3'          | 225               | RT-PCR           | 94°C,        | 94°C,      | 60°C,      | 72°C,      | 72°C,            | 35     |
| Zdbf2_RT_ex7R     | exon 7           | chr1: 63,361,079  |                                 | 5'-TTAACTGAGTCCATCGGCTCTTC-3'         |                   | 1 min            | 30 s         | 30 s       | 30 s       | 30 s       | 5 min            |        |
| Gpr1_DMR_BSF1     | <i>Gpr1</i>      | see Fig. 6        | chr1: 63,246,988 - 63,247,117   | 5'-AGATTAGGTTAGTTTGGAAIT-3'           | 130               | BS               | 98°C,        | 98°C,      | 57°C,      | 72°C,      | 72°C,            | 35     |
| Gpr1_DMR_BSR2     | DMR              |                   |                                 | 5'-AACACTAATCACCAATAATTC-3'           |                   | 30 s             | 10 s         | 30 s       | 30 s       | 5 min      |                  |        |
| Actb_RT_F         | <i>Actb</i>      |                   | chr5: 143,664,856 - 143,665,043 | 5'-AGGTGACAGCATTGCTTCTG-3'            | 188               | Real-time RT-PCR | 95°C,        | 95°C,      | 62°C,      | 72°C,      |                  | 40     |
| Actb_RT_R         | exon 1           |                   |                                 | 5'-GCTGCCTCAACACCTCAAC-3'             |                   | 30 s             | 5 s          | 30 s       | 30 s       |            |                  |        |
